# Supplementary material for: A fluorescent biosensor for highly specific and ultrasensitive detection of adenosine triphosphate based on ligation-triggered branched rolling circle amplification
Source: Royal Society of Chemistry journal article supplement (doi:10.1039/c9ay01482a), 2019-01-01
Supplement: c9ay01482a1.pdf [file c9ay01482a1.pdf]

## Supporting Information for

# **A fluorescent biosensor for highly specific and ultrasensitive detection of adenosine triphosphate based on ligation-triggered branched rolling circle amplification**

Hongxin Jiang <sup>a,b</sup>, Guimei Han <sup>c</sup> Yaping Xu <sup>a,b</sup>, Junxing Li <sup>a,b</sup>, Xiaowei Liu <sup>a,b,\*</sup>, Deming Kong <sup>d,e,\*</sup>

<sup>a</sup> *Agro-Environmental Protection Institute, Ministry of Agriculture, Tianjin 300191, PR China*

<sup>b</sup> *Key Laboratory for environmental factors control of Agro-product quality safety, Ministry of Agriculture, Tianjin,300191, China*

<sup>c</sup> *College of Chemistry and Chemical Engineering, Qilu Normal University, Jinan, 250000, P. R. China*

<sup>d</sup> *State Key Laboratory of Medicinal Chemical Biology, Nankai University, Tianjin, 300071, P. R. China*

<sup>e</sup> *Tianjin Key Laboratory of Biosensing and Molecular Recognition, Research Center for Analytical Sciences, Nankai University, Tianjin, 300071, P. R. China*

\* *Corresponding author. Tel.: 022-23611160; +86-22-23500938*

*E-mail address: [xwliu2006@163.com](mailto:xwliu2006@163.com) (X.-W. Liu);*

*E-mail address: [kongdem@nankai.edu.cn](mailto:kongdem@nankai.edu.cn) (D.-M. Kong).*

## 1. The oligonucleotides used in this work

**Table S1: The oligonucleotides used in this work**

| <b>Name</b>    | <b>Sequence (5'–3')</b>                        |
|----------------|------------------------------------------------|
| LT             | CTCACACGAATTCATCTGAC                           |
| PadLock        | P-ATTCGTGTGAGAAAACGGAAGTGCCTAGGCAAAAAGTCAGATGA |
| Primer         | TCATCTGAC                                      |
| Reverse Primer | AGGCAAAAAGT                                    |

“P” in PadLock indicate 5'-phosphorylation modification.

## 2. Optimization of experimental conditions for the sensing system

The experiment conditions, including digestion reaction time, ligation reaction time, BRCA reaction time and the amounts of SG I and phi29 DNA polymerase were investigated. **Figure S1** shown the optimization results, the optimal digestion reaction time, ligation reaction time and RCA reaction time were 1.0 h, 1.5 h and 3.0 h, respectively. The optimized amounts of SG I and phi29 DNA polymerase were 2 × and 5 U respectively.

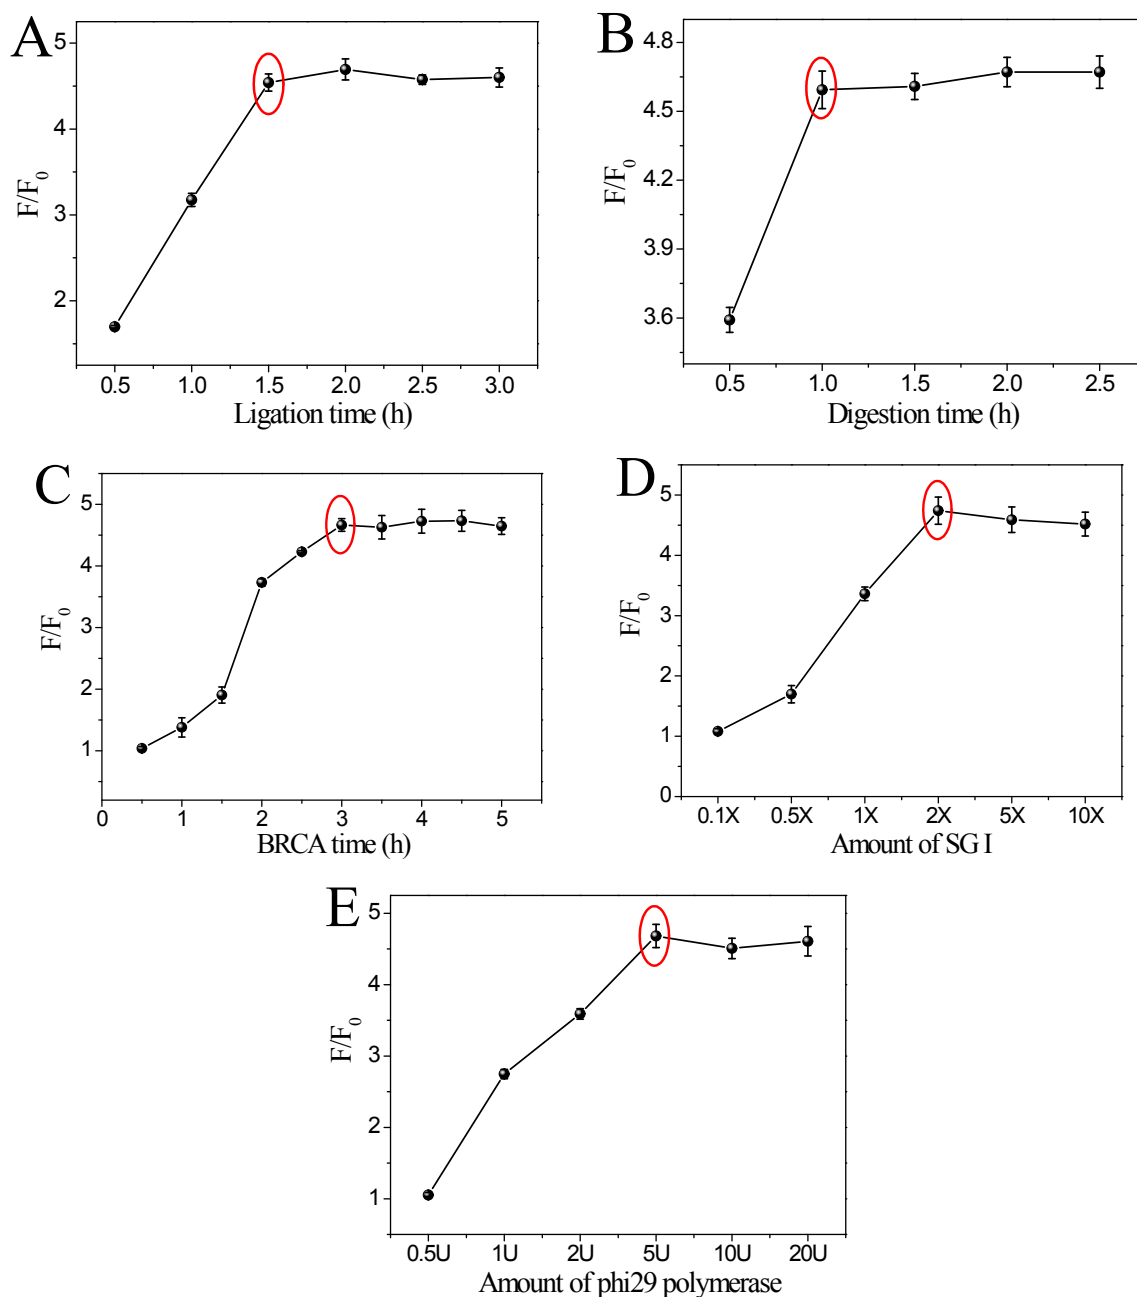

**Figure S1.** Optimization of ligation reaction time (a), digestion reaction time (b), BRCA reaction time (c), amounts of SG I (d) and phi29 DNA polymerase (e) in BRCA-based ATP-sensing system.  $F$  and  $F_0$  are the fluorescence intensities of SG I at 525 nm in the presence and absence of 1  $\mu$ M ATP, respectively.

### 3. Specificity of the proposed ATP sensor

In order to evaluate the selectivity of this strategy for ATP detection, the fluorescence responses of the sensing platform to several ATP analogs were tested and compared with that to ATP under the same conditions (**Figure S2**). When 1 $\mu$ M ADP, AMP, UTP, CTP or GTP was added in the sensing system instead of ATP, no obvious fluorescence enhancement could be observed compared to the blank control without ATP. However, the fluorescence intensity was obviously enhanced when the same concentration (1 $\mu$ M) of ATP was added. The experimental results demonstrated that this sensing system shows high selectivity toward ATP detection and has good capability to discriminate ATP from its analogs.

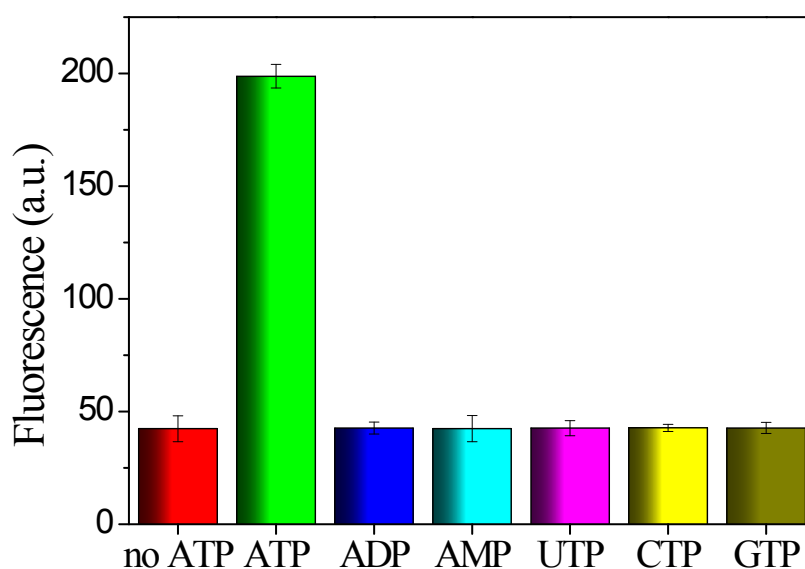

**Figure S2.** The concentration of ATP and those of its analogs (UTP, CTP, GTP and AMP) are all 1  $\mu$ M. The error bars show the standard deviation of three independent experiments.

#### 4. Application of the proposed method in real human serum and HeLa cell lysates nucleoprotein samples

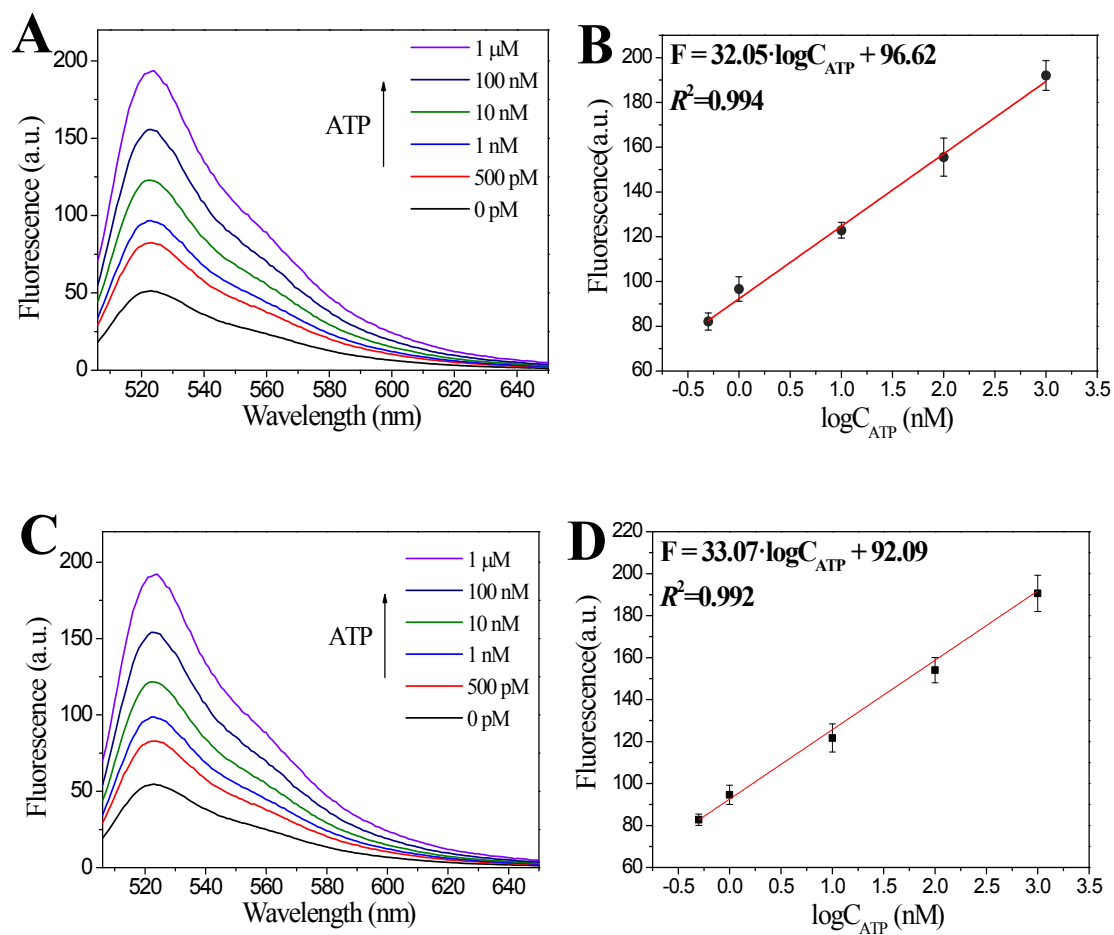

**Figure S3.** The fluorescence signal change as a function of ATP concentration in (A) (B) human serum, and (C) (D) HeLa cell lysates. The error bars show the standard deviation of three independent experiments.

## 5. ATP detection in serum samples and HeLa cell lysates nucleoprotein samples

**Table S2.** Recoveries of added ATP in 20-fold diluted human serum and 10-fold diluted HeLa cell lysates nucleoprotein samples

| <b>Real sample</b>                                     | <b>Added (nM)</b> | <b>Found (nM)</b> | <b>Recovery (%)</b> | <b>RSD (% , n=3)</b> |
|--------------------------------------------------------|-------------------|-------------------|---------------------|----------------------|
|                                                        | 0.5               | 0.522             | 104.4               | 5.8                  |
|                                                        | 1                 | 0.952             | 95.2                | 3.9                  |
| <b>20-fold diluted Human Serum</b>                     | 10                | 9.59              | 95.9                | 6.7                  |
|                                                        | 100               | 97.8              | 97.8                | 4.2                  |
|                                                        | 1000              | 9986              | 98.6                | 5.4                  |
|                                                        | 0.5               | 0.482             | 96.4                | 4.2                  |
| <b>10-fold diluted Hela cell lysates nucleoprotein</b> | 1                 | 1.02              | 102                 | 3.9                  |
|                                                        | 10                | 9.86              | 98.6                | 5.1                  |
|                                                        | 100               | 99.5              | 99.5                | 2.1                  |
|                                                        | 1000              | 1025              | 103                 | 3.2                  |
